# Supplementary material for: Concealing messages at the atomic-thin level by reaching the limit of writing
Source: Research Square preprint supplement (doi:10.21203/rs.3.rs-111143/v1), 2020-12-08
Supplement: Supplementary file 1 [file a951c6d212823e3e384c2df8.docx]

Supplementary Information for

**Concealing messages at the atomic-thin level by reaching the limit of writing**

**Chao Hou1,3,** **Qirong Yang1,3, Jianxin Guan1, Jingwen Deng1,Zihan Xu2, Zhihao Yu1* & Junrong Zheng1***

1College of Chemistry and Molecular Engineering, Beijing National Laboratory for Molecular Sciences, Peking University, Beijing 100871, China.

2Shenzhen Sixcarbon Technology, Shenzhen 518106, China.

3These authors contributed equally: Chao Hou, Qirong Yang.

*e-mail: [junrong@pku.edu.cn](mailto:junrong@pku.edu.cn); zhengjunrong@gmail.com; [zhihaoyu@pku.edu.cn](mailto:zhihaoyu@pku.edu.cn)


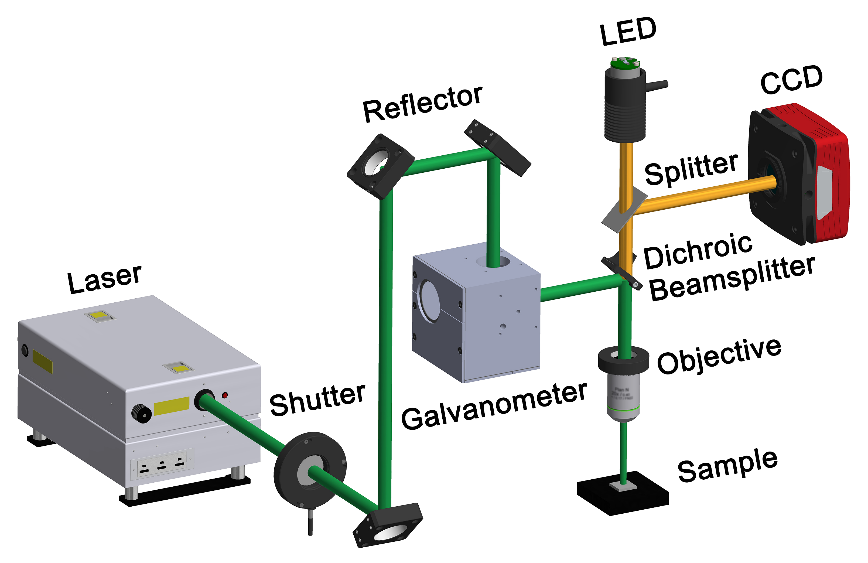


**Supplementary Figure 1:** **A schematic for our home-built** **laser writing setup**.


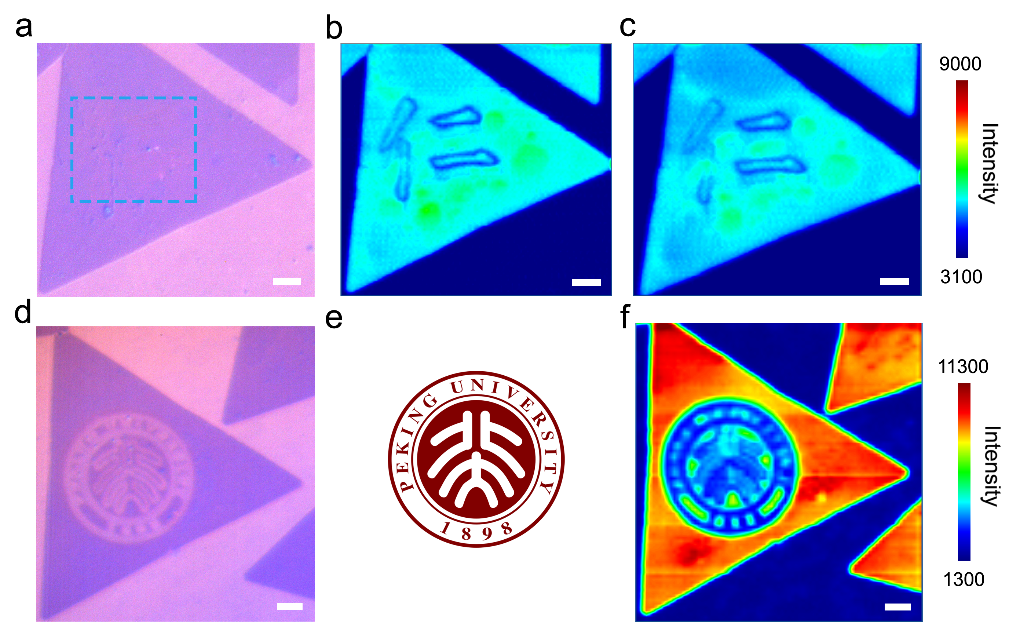


**Supplementary Figure 2:** **The laser over-written examples on monolayer MoS2**. **a**, The optical image of a monolayer MoS2 triangle domain after laser writing within the blue rectangle area using “仁” as a pattern, showing slight over-written traces. **b**&**c**, The PL mappings before and after erasing by adsorbing H2O molecules, which indicates that the slight over-written pattern cannot be erased. **d**, Optical image of a monolayer MoS2 triangle domain after significant laser over-writing using the badge of the Peking University shown in **e** as a pattern. **f**, The corresponding PL mapping for **d**, which cannot be erased, either. Scale bars are all 4 μm.


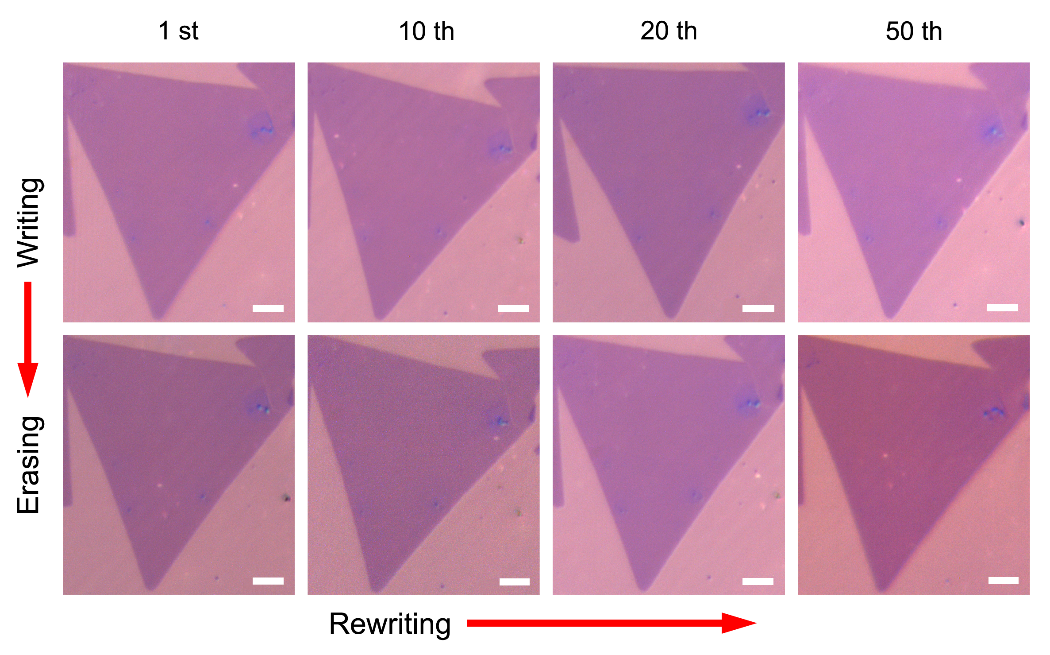


**Supplementary Figure 3:** **Repeatable laser writing and erasing on MoS2 monolayer**. The optical images corresponding to **Fig. 3** for the 1st, 10th, 20th, 50th laser writing and erasing cycle on the same monolayer MoS2 triangle domain. Scale bars are all 4 μm.
